# Supplementary material for: A Morphology-Based Machine Learning Model for Scoring Epithelial-Mesenchymal Plasticity using Organelle Dynamics.
Source: Research Square preprint supplement (doi:10.21203/rs.3.rs-5859608/v1), 2025-03-21
Supplement: Supplementary file 1 [file 9d44d1b2581b597334e11325.xlsx]

## Sheet: Before feature selection
Classifier		Condition	precision	recall	f1-score	support	average
K-Nearest Neighbors	Cross-Validation Report	24h TGFb1	0.985	0.929245	0.956311	212
K-Nearest Neighbors	Cross-Validation Report	48h TGFb1	0.866142	0.956522	0.909091	230
K-Nearest Neighbors	Cross-Validation Report	4d TGFb1	0.900474	0.87156	0.885781	218
K-Nearest Neighbors	Cross-Validation Report	8d TGFb1	0.967949	0.949686	0.95873	318
K-Nearest Neighbors	Cross-Validation Report	Control	0.981191	0.984277	0.982732	318
K-Nearest Neighbors	Cross-Validation Report	macro avg	0.940151	0.938258	0.938529	1296
K-Nearest Neighbors	Cross-Validation Report	weighted avg	0.94457	0.942901	0.943143	1296
K-Nearest Neighbors	Test Set Report	24h TGFb1	0.948276	0.948276	0.948276	58
K-Nearest Neighbors	Test Set Report	48h TGFb1	0.866667	0.975	0.917647	40
K-Nearest Neighbors	Test Set Report	4d TGFb1	0.942308	0.942308	0.942308	52
K-Nearest Neighbors	Test Set Report	8d TGFb1	0.988235	0.965517	0.976744	87
K-Nearest Neighbors	Test Set Report	Control	0.988095	0.954023	0.97076	87
K-Nearest Neighbors	Test Set Report	macro avg	0.946716	0.957025	0.951147	324
K-Nearest Neighbors	Test Set Report	weighted avg	0.958665	0.95679	0.957218	324
Linear SVC	Cross-Validation Report	24h TGFb1	0.971963	0.981132	0.976526	212
Linear SVC	Cross-Validation Report	48h TGFb1	0.969298	0.96087	0.965066	230
Linear SVC	Cross-Validation Report	4d TGFb1	0.967742	0.963303	0.965517	218
Linear SVC	Cross-Validation Report	8d TGFb1	0.981308	0.990566	0.985915	318
Linear SVC	Cross-Validation Report	Control	0.993671	0.987421	0.990536	318
Linear SVC	Cross-Validation Report	macro avg	0.976796	0.976658	0.976712	1296
Linear SVC	Cross-Validation Report	weighted avg	0.9784	0.978395	0.978382	1296
Linear SVC	Test Set Report	24h TGFb1	0.982759	0.982759	0.982759	58
Linear SVC	Test Set Report	48h TGFb1	1	1	1	40
Linear SVC	Test Set Report	4d TGFb1	0.980769	0.980769	0.980769	52
Linear SVC	Test Set Report	8d TGFb1	0.988506	0.988506	0.988506	87
Linear SVC	Test Set Report	Control	0.988506	0.988506	0.988506	87
Linear SVC	Test Set Report	macro avg	0.988108	0.988108	0.988108	324
Linear SVC	Test Set Report	weighted avg	0.987654	0.987654	0.987654	324
SGD	Cross-Validation Report	24h TGFb1	0.962085	0.957547	0.959811	212
SGD	Cross-Validation Report	48h TGFb1	0.940426	0.96087	0.950538	230
SGD	Cross-Validation Report	4d TGFb1	0.967742	0.963303	0.965517	218
SGD	Cross-Validation Report	8d TGFb1	0.98125	0.987421	0.984326	318
SGD	Cross-Validation Report	Control	0.990415	0.974843	0.982567	318
SGD	Cross-Validation Report	macro avg	0.968384	0.968797	0.968552	1296
SGD	Cross-Validation Report	weighted avg	0.970847	0.970679	0.970724	1296
SGD	Test Set Report	24h TGFb1	0.933333	0.965517	0.949153	58
SGD	Test Set Report	48h TGFb1	0.975	0.975	0.975	40
SGD	Test Set Report	4d TGFb1	0.962264	0.980769	0.971429	52
SGD	Test Set Report	8d TGFb1	0.988372	0.977011	0.982659	87
SGD	Test Set Report	Control	0.988235	0.965517	0.976744	87
SGD	Test Set Report	macro avg	0.969441	0.972763	0.970997	324
SGD	Test Set Report	weighted avg	0.972642	0.972222	0.972325	324
RBF Kernel	Cross-Validation Report	24h TGFb1	0.958716	0.985849	0.972093	212
RBF Kernel	Cross-Validation Report	48h TGFb1	0.973451	0.956522	0.964912	230
RBF Kernel	Cross-Validation Report	4d TGFb1	0.972093	0.958716	0.965358	218
RBF Kernel	Cross-Validation Report	8d TGFb1	0.972393	0.996855	0.984472	318
RBF Kernel	Cross-Validation Report	Control	0.996785	0.974843	0.985692	318
RBF Kernel	Cross-Validation Report	macro avg	0.974687	0.974557	0.974505	1296
RBF Kernel	Cross-Validation Report	weighted avg	0.976278	0.97608	0.97606	1296
RBF Kernel	Test Set Report	24h TGFb1	0.932203	0.948276	0.940171	58
RBF Kernel	Test Set Report	48h TGFb1	0.95122	0.975	0.962963	40
RBF Kernel	Test Set Report	4d TGFb1	1	0.961538	0.980392	52
RBF Kernel	Test Set Report	8d TGFb1	0.977528	1	0.988636	87
RBF Kernel	Test Set Report	Control	0.988235	0.965517	0.976744	87
RBF Kernel	Test Set Report	macro avg	0.969837	0.970066	0.969781	324
RBF Kernel	Test Set Report	weighted avg	0.972648	0.972222	0.972274	324
Random Forest	Cross-Validation Report	24h TGFb1	0.948598	0.957547	0.953052	212
Random Forest	Cross-Validation Report	48h TGFb1	0.965368	0.969565	0.967462	230
Random Forest	Cross-Validation Report	4d TGFb1	0.962085	0.931193	0.946387	218
Random Forest	Cross-Validation Report	8d TGFb1	0.956923	0.977987	0.967341	318
Random Forest	Cross-Validation Report	Control	0.980952	0.971698	0.976303	318
Random Forest	Cross-Validation Report	macro avg	0.962785	0.961598	0.962109	1296
Random Forest	Cross-Validation Report	weighted avg	0.963824	0.963735	0.963699	1296
Random Forest	Test Set Report	24h TGFb1	0.916667	0.948276	0.932203	58
Random Forest	Test Set Report	48h TGFb1	0.95122	0.975	0.962963	40
Random Forest	Test Set Report	4d TGFb1	1	0.961538	0.980392	52
Random Forest	Test Set Report	8d TGFb1	0.977528	1	0.988636	87
Random Forest	Test Set Report	Control	0.988095	0.954023	0.97076	87
Random Forest	Test Set Report	macro avg	0.966702	0.967767	0.966991	324
Random Forest	Test Set Report	weighted avg	0.969829	0.969136	0.969241	324
Hist Gradient Boosting	Cross-Validation Report	24h TGFb1	0.962085	0.957547	0.959811	212
Hist Gradient Boosting	Cross-Validation Report	48h TGFb1	0.965368	0.969565	0.967462	230
Hist Gradient Boosting	Cross-Validation Report	4d TGFb1	0.958904	0.963303	0.961098	218
Hist Gradient Boosting	Cross-Validation Report	8d TGFb1	0.977987	0.977987	0.977987	318
Hist Gradient Boosting	Cross-Validation Report	Control	0.984227	0.981132	0.982677	318
Hist Gradient Boosting	Cross-Validation Report	macro avg	0.969714	0.969907	0.969807	1296
Hist Gradient Boosting	Cross-Validation Report	weighted avg	0.971468	0.971451	0.971456	1296
Hist Gradient Boosting	Test Set Report	24h TGFb1	0.95	0.982759	0.966102	58
Hist Gradient Boosting	Test Set Report	48h TGFb1	1	0.975	0.987342	40
Hist Gradient Boosting	Test Set Report	4d TGFb1	1	1	1	52
Hist Gradient Boosting	Test Set Report	8d TGFb1	1	1	1	87
Hist Gradient Boosting	Test Set Report	Control	0.988372	0.977011	0.982659	87
Hist Gradient Boosting	Test Set Report	macro avg	0.987674	0.986954	0.98722	324
Hist Gradient Boosting	Test Set Report	weighted avg	0.987927	0.987654	0.987713	324
K-Nearest Neighbors	Cross-Validation Report	accuracy					0.942901
K-Nearest Neighbors	Test Set Report	accuracy					0.95679
Linear SVC	Cross-Validation Report	accuracy					0.978395
Linear SVC	Test Set Report	accuracy					0.987654
SGD	Cross-Validation Report	accuracy					0.970679
SGD	Test Set Report	accuracy					0.972222
RBF Kernel	Cross-Validation Report	accuracy					0.97608
RBF Kernel	Test Set Report	accuracy					0.972222
Random Forest	Cross-Validation Report	accuracy					0.963735
Random Forest	Test Set Report	accuracy					0.969136
Hist Gradient Boosting	Cross-Validation Report	accuracy					0.971451
Hist Gradient Boosting	Test Set Report	accuracy					0.987654

## Sheet: After feature selection
Classifier		Condition	precision	recall	f1-score	support	average
K-Nearest Neighbors	Cross-Validation Report	24h TGFb1	0.944444	0.962264	0.953271	212
K-Nearest Neighbors	Cross-Validation Report	48h TGFb1	0.889831	0.913043	0.901288	230
K-Nearest Neighbors	Cross-Validation Report	4d TGFb1	0.884793	0.880734	0.882759	218
K-Nearest Neighbors	Cross-Validation Report	8d TGFb1	0.970779	0.940252	0.955272	318
K-Nearest Neighbors	Cross-Validation Report	Control	0.971787	0.974843	0.973312	318
K-Nearest Neighbors	Cross-Validation Report	macro avg	0.932327	0.934227	0.93318	1296
K-Nearest Neighbors	Cross-Validation Report	weighted avg	0.937889	0.9375	0.937593	1296
K-Nearest Neighbors	Test Set Report	24h TGFb1	0.964912	0.948276	0.956522	58
K-Nearest Neighbors	Test Set Report	48h TGFb1	0.925	0.925	0.925	40
K-Nearest Neighbors	Test Set Report	4d TGFb1	0.924528	0.942308	0.933333	52
K-Nearest Neighbors	Test Set Report	8d TGFb1	0.988235	0.965517	0.976744	87
K-Nearest Neighbors	Test Set Report	Control	0.966292	0.988506	0.977273	87
K-Nearest Neighbors	Test Set Report	macro avg	0.953794	0.953921	0.953774	324
K-Nearest Neighbors	Test Set Report	weighted avg	0.960137	0.959877	0.959911	324
Linear SVC	Cross-Validation Report	24h TGFb1	0.939535	0.95283	0.946136	212
Linear SVC	Cross-Validation Report	48h TGFb1	0.864407	0.886957	0.875536	230
Linear SVC	Cross-Validation Report	4d TGFb1	0.888889	0.844037	0.865882	218
Linear SVC	Cross-Validation Report	8d TGFb1	0.96875	0.974843	0.971787	318
Linear SVC	Cross-Validation Report	Control	0.977987	0.977987	0.977987	318
Linear SVC	Cross-Validation Report	macro avg	0.927914	0.927331	0.927466	1296
Linear SVC	Cross-Validation Report	weighted avg	0.934286	0.934414	0.934217	1296
Linear SVC	Test Set Report	24h TGFb1	0.965517	0.965517	0.965517	58
Linear SVC	Test Set Report	48h TGFb1	0.878049	0.9	0.888889	40
Linear SVC	Test Set Report	4d TGFb1	0.903846	0.903846	0.903846	52
Linear SVC	Test Set Report	8d TGFb1	0.988372	0.977011	0.982659	87
Linear SVC	Test Set Report	Control	0.988506	0.988506	0.988506	87
Linear SVC	Test Set Report	macro avg	0.944858	0.946976	0.945883	324
Linear SVC	Test Set Report	weighted avg	0.957131	0.95679	0.956935	324
SGD	Cross-Validation Report	24h TGFb1	0.923767	0.971698	0.947126	212
SGD	Cross-Validation Report	48h TGFb1	0.897778	0.878261	0.887912	230
SGD	Cross-Validation Report	4d TGFb1	0.862222	0.889908	0.875847	218
SGD	Cross-Validation Report	8d TGFb1	0.977636	0.962264	0.969889	318
SGD	Cross-Validation Report	Control	0.987097	0.962264	0.974522	318
SGD	Cross-Validation Report	macro avg	0.9297	0.932879	0.931059	1296
SGD	Cross-Validation Report	weighted avg	0.937559	0.936728	0.936935	1296
SGD	Test Set Report	24h TGFb1	0.965517	0.965517	0.965517	58
SGD	Test Set Report	48h TGFb1	0.864865	0.8	0.831169	40
SGD	Test Set Report	4d TGFb1	0.854545	0.903846	0.878505	52
SGD	Test Set Report	8d TGFb1	0.988372	0.977011	0.982659	87
SGD	Test Set Report	Control	0.977273	0.988506	0.982857	87
SGD	Test Set Report	macro avg	0.930114	0.926976	0.928141	324
SGD	Test Set Report	weighted avg	0.944574	0.944444	0.944225	324
RBF Kernel	Cross-Validation Report	24h TGFb1	0.953052	0.957547	0.955294	212
RBF Kernel	Cross-Validation Report	48h TGFb1	0.947368	0.93913	0.943231	230
RBF Kernel	Cross-Validation Report	4d TGFb1	0.918919	0.93578	0.927273	218
RBF Kernel	Cross-Validation Report	8d TGFb1	0.98722	0.971698	0.979398	318
RBF Kernel	Cross-Validation Report	Control	0.978125	0.984277	0.981191	318
RBF Kernel	Cross-Validation Report	macro avg	0.956937	0.957686	0.957277	1296
RBF Kernel	Cross-Validation Report	weighted avg	0.960838	0.960648	0.960709	1296
RBF Kernel	Test Set Report	24h TGFb1	0.982456	0.965517	0.973913	58
RBF Kernel	Test Set Report	48h TGFb1	0.95	0.95	0.95	40
RBF Kernel	Test Set Report	4d TGFb1	0.980769	0.980769	0.980769	52
RBF Kernel	Test Set Report	8d TGFb1	1	1	1	87
RBF Kernel	Test Set Report	Control	0.988636	1	0.994286	87
RBF Kernel	Test Set Report	macro avg	0.980372	0.979257	0.979794	324
RBF Kernel	Test Set Report	weighted avg	0.984549	0.984568	0.984536	324
Random Forest	Cross-Validation Report	24h TGFb1	0.948837	0.962264	0.955504	212
Random Forest	Cross-Validation Report	48h TGFb1	0.929204	0.913043	0.921053	230
Random Forest	Cross-Validation Report	4d TGFb1	0.890909	0.899083	0.894977	218
Random Forest	Cross-Validation Report	8d TGFb1	0.953271	0.962264	0.957746	318
Random Forest	Cross-Validation Report	Control	0.987261	0.974843	0.981013	318
Random Forest	Cross-Validation Report	macro avg	0.941896	0.942299	0.942058	1296
Random Forest	Cross-Validation Report	weighted avg	0.946125	0.945988	0.946018	1296
Random Forest	Test Set Report	24h TGFb1	0.949153	0.965517	0.957265	58
Random Forest	Test Set Report	48h TGFb1	0.926829	0.95	0.938272	40
Random Forest	Test Set Report	4d TGFb1	0.958333	0.884615	0.92	52
Random Forest	Test Set Report	8d TGFb1	0.955056	0.977011	0.965909	87
Random Forest	Test Set Report	Control	0.977011	0.977011	0.977011	87
Random Forest	Test Set Report	macro avg	0.953277	0.950831	0.951691	324
Random Forest	Test Set Report	weighted avg	0.956936	0.95679	0.956563	324
Hist Gradient Boosting	Cross-Validation Report	24h TGFb1	0.93578	0.962264	0.948837	212
Hist Gradient Boosting	Cross-Validation Report	48h TGFb1	0.931915	0.952174	0.941935	230
Hist Gradient Boosting	Cross-Validation Report	4d TGFb1	0.932367	0.885321	0.908235	218
Hist Gradient Boosting	Cross-Validation Report	8d TGFb1	0.95356	0.968553	0.960998	318
Hist Gradient Boosting	Cross-Validation Report	Control	0.980831	0.965409	0.973059	318
Hist Gradient Boosting	Cross-Validation Report	macro avg	0.946891	0.946744	0.946613	1296
Hist Gradient Boosting	Cross-Validation Report	weighted avg	0.949937	0.949846	0.94971	1296
Hist Gradient Boosting	Test Set Report	24h TGFb1	0.982759	0.982759	0.982759	58
Hist Gradient Boosting	Test Set Report	48h TGFb1	0.948718	0.925	0.936709	40
Hist Gradient Boosting	Test Set Report	4d TGFb1	0.96	0.923077	0.941176	52
Hist Gradient Boosting	Test Set Report	8d TGFb1	0.965909	0.977011	0.971429	87
Hist Gradient Boosting	Test Set Report	Control	0.977528	1	0.988636	87
Hist Gradient Boosting	Test Set Report	macro avg	0.966983	0.961569	0.964142	324
Hist Gradient Boosting	Test Set Report	weighted avg	0.968975	0.969136	0.968936	324
K-Nearest Neighbors	Cross-Validation Report	accuracy					0.9375
K-Nearest Neighbors	Test Set Report	accuracy					0.959877
Linear SVC	Cross-Validation Report	accuracy					0.934414
Linear SVC	Test Set Report	accuracy					0.95679
SGD	Cross-Validation Report	accuracy					0.936728
SGD	Test Set Report	accuracy					0.944444
RBF Kernel	Cross-Validation Report	accuracy					0.960648
RBF Kernel	Test Set Report	accuracy					0.984568
Random Forest	Cross-Validation Report	accuracy					0.945988
Random Forest	Test Set Report	accuracy					0.95679
Hist Gradient Boosting	Cross-Validation Report	accuracy					0.949846
Hist Gradient Boosting	Test Set Report	accuracy					0.969136
