# Supplementary material for: A Morphology-Based Machine Learning Model for Scoring Epithelial-Mesenchymal Plasticity using Organelle Dynamics.
Source: Research Square preprint supplement (doi:10.21203/rs.3.rs-5859608/v1), 2025-03-21
Supplement: Supplementary file 1 [file 5476e0d292d97bc2ed9c8351.pdf]

# **A Morphology-Based Machine Learning Model for Scoring Epithelial-Mesenchymal Plasticity using Organelle Dynamics**

**Justin Slager<sup>1</sup>, Francesca Gatto<sup>1</sup>, Benjamin Frey<sup>2</sup>, Wenyang Shi<sup>1</sup>, Bartlomiej Porebski<sup>3,4</sup>,  
Jordi Carreras-Puigvert<sup>2</sup>, Malgorzata Maria Parniewska<sup>1</sup> and Jonas Fuxe<sup>1,\*</sup>**

## **Supplementary Information**

|                                |                |
|--------------------------------|----------------|
| <b>Supplementary Figure 1:</b> | <b>page 2</b>  |
| <b>Supplementary Figure 2:</b> | <b>page 3</b>  |
| <b>Supplementary Figure 3:</b> | <b>page 4</b>  |
| <b>Supplementary Figure 4:</b> | <b>page 5</b>  |
| <b>Supplementary Figure 5:</b> | <b>page 6</b>  |
| <b>Supplementary Figure 6:</b> | <b>page 7</b>  |
| <b>Supplementary Figure 7:</b> | <b>page 8</b>  |
| <b>Supplementary Table 3:</b>  | <b>page 9</b>  |
| <b>Supplementary Table 4:</b>  | <b>page 10</b> |

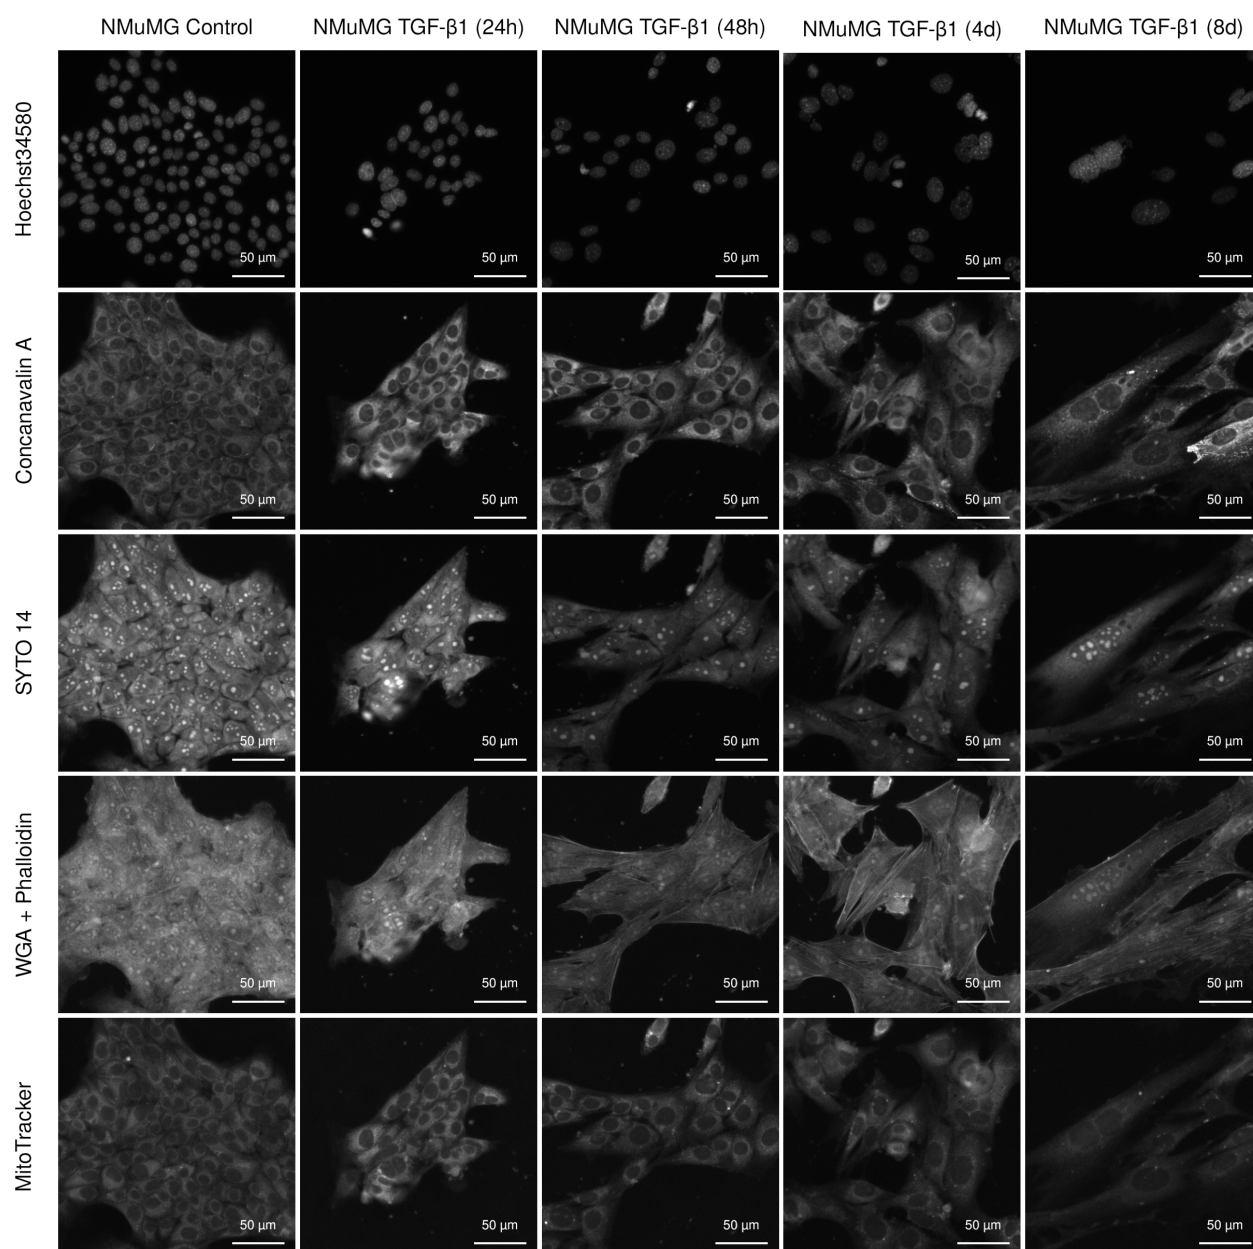

**Figure S1. Visualization of organelle dynamics during TGF- $\beta$ 1-induced EMT in NMuMG cells.** Representative fluorescent images of NMuMG cells stained with the Cell Painting assay to visualize organelle changes at different stages of TGF- $\beta$ 1-induced EMT. Images were taken on a high-throughput Nikon CrEST X-Light V3 spinning disc imaging system, with a 20x objective. Scale bars represent 50  $\mu$ m. The intensity values of all images displayed were adjusted for enhanced visualization, adjustments were equalized for fair image comparison.

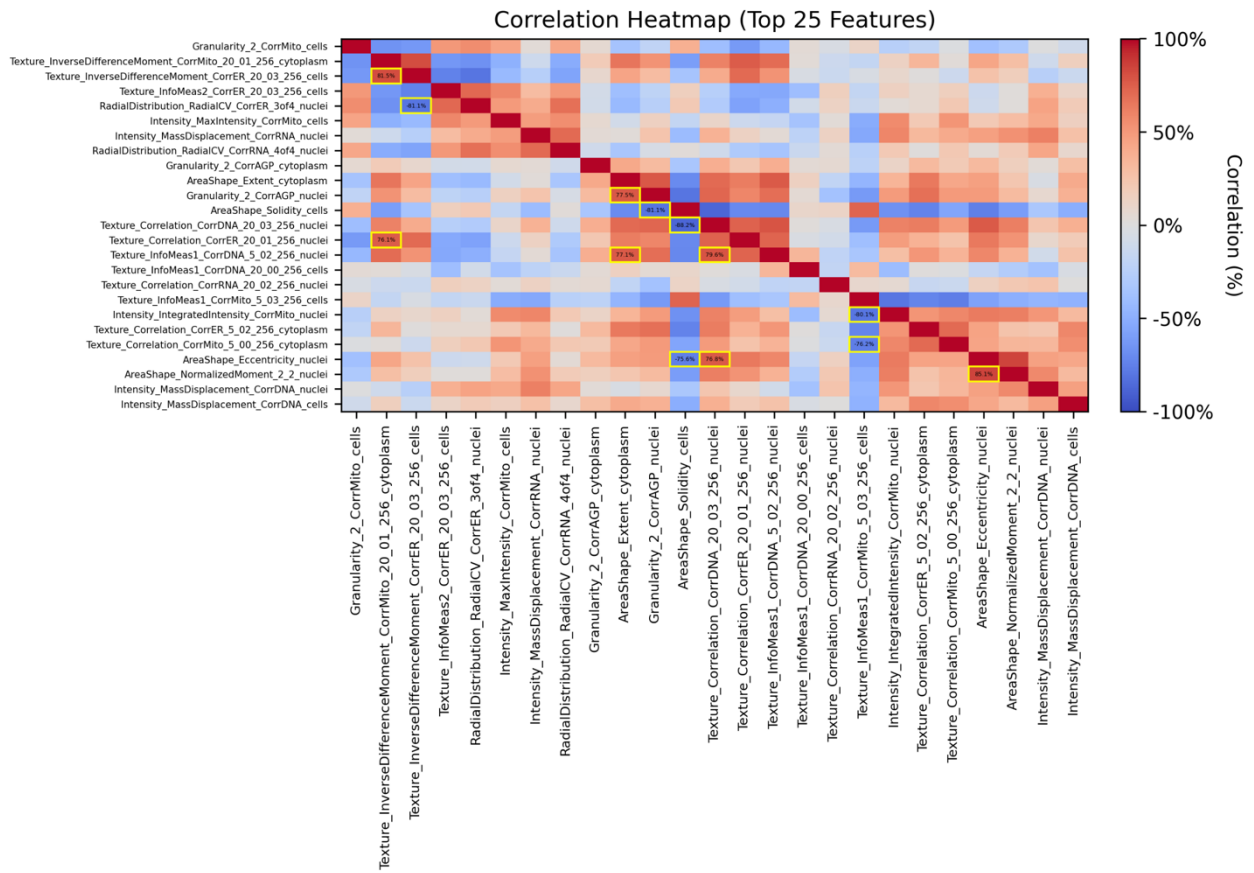

**Figure S2. Refinement of data by removal of redundant features.** A correlation heatmap based on Spearman's ranking was calculated and plotted. Highly correlated (absolute value of 75%) features (highlighted by a yellow box) were removed due to redundancy.

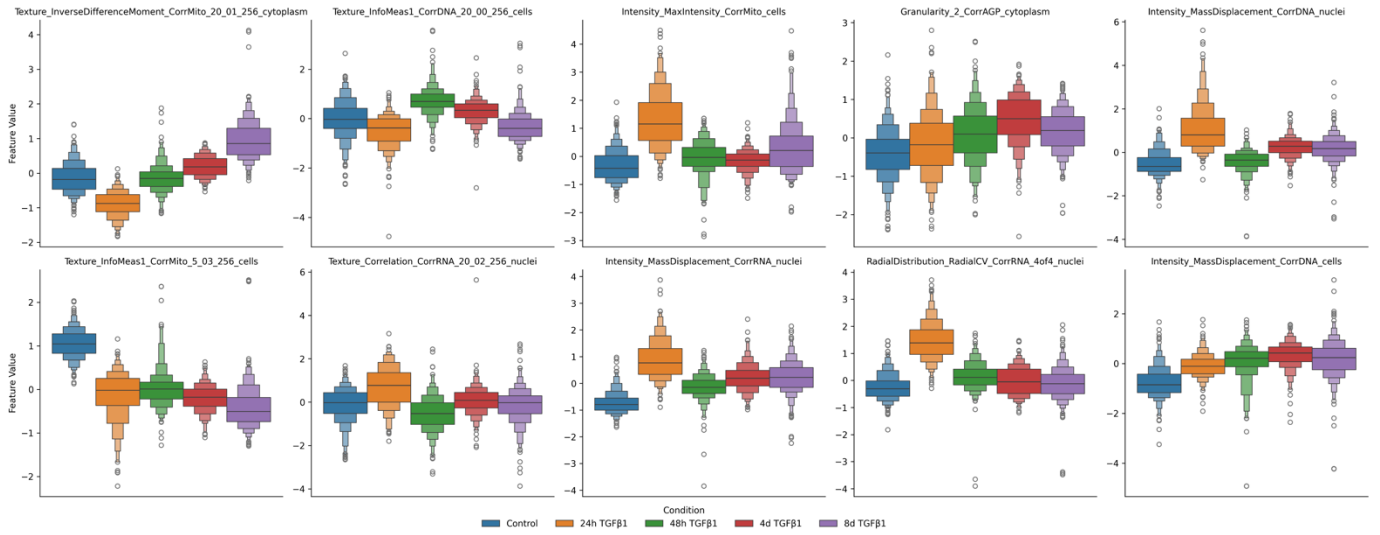

**Figure S3. Distribution of top 6-15 features across different stages of TGF- $\beta$ 1-induced EMT.** Probability distribution of model-predicted conditions for aggregated profiles in individual wells. Each subplot represents all the wells containing the same experimental condition. The x-axis denotes well IDs, and the y-axis represents the probability (0 to 1) assigned by the model for each condition. Error bars indicate variability in the predictions. (N=9 per well)

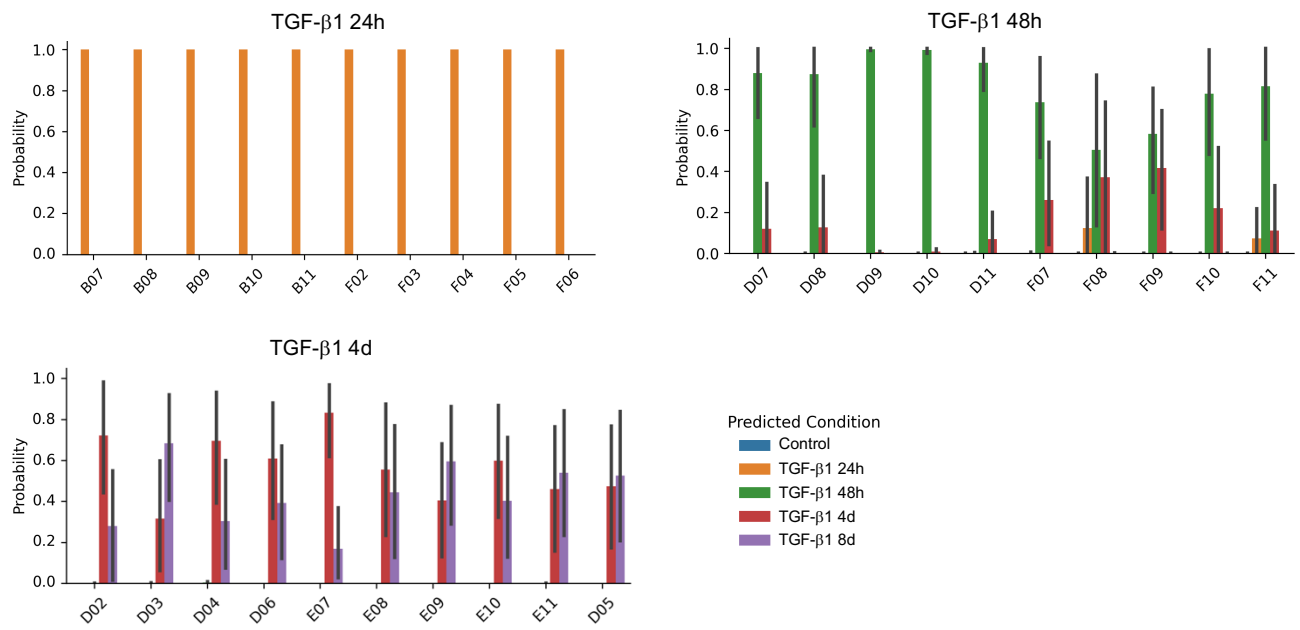

**Figure S4. Probability distribution of model-predicted conditions for aggregated profiles in individual wells.** Each subplot represents all the wells containing the same experimental condition. The x-axis denotes well IDs, and the y-axis represents the probability (0 to 1) assigned by the model for each condition. Bars are color-coded as indicated. Error bars indicate variability in the predictions. (N=9 per well)

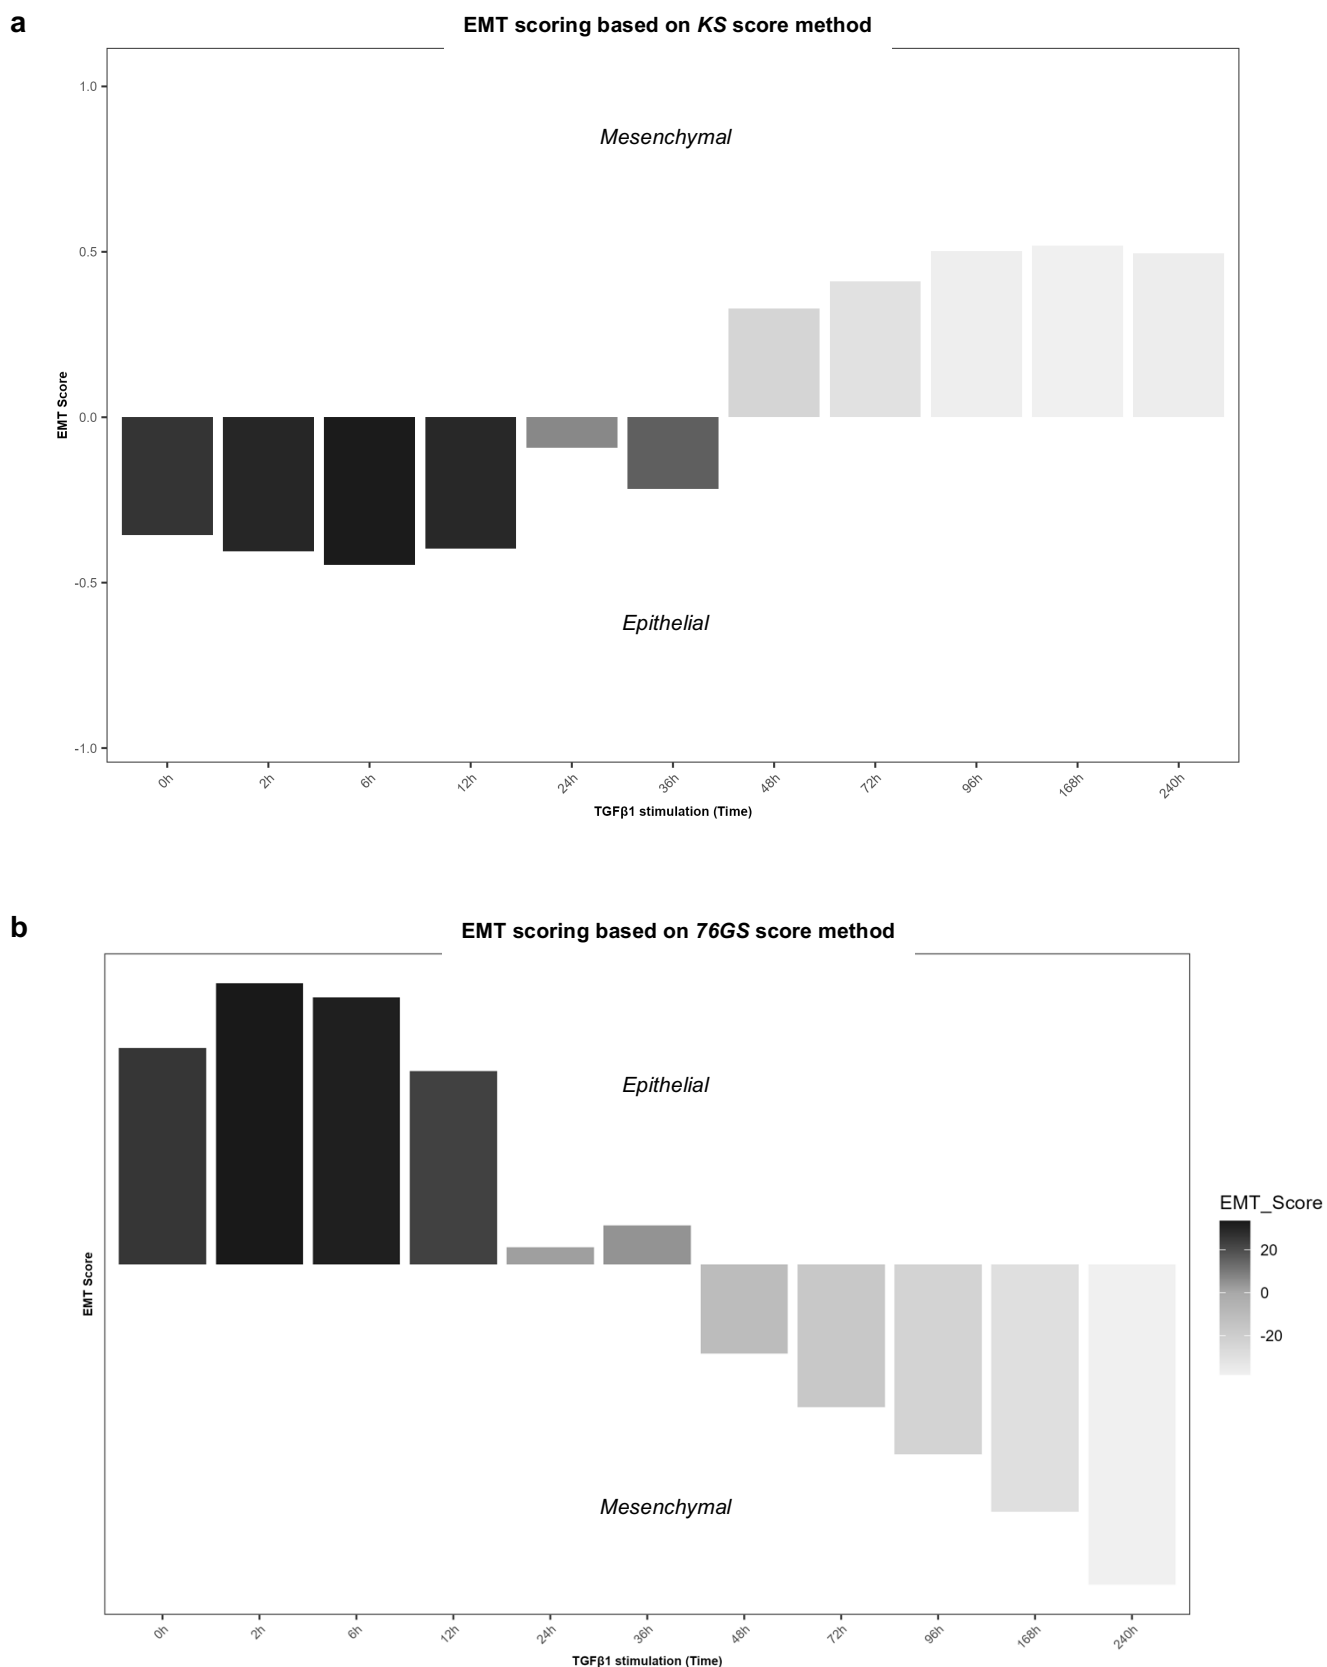

**Figure S5. EMT scores based on gene expression analysis.** (a, b) Scoring of EMT at different stages of TGF- $\beta$ 1-induced EMT in NMuMG cells by gene expression methods derived from Chakraborty et al. (2020) (a, KSScore) and the weighted sum of 76 EMT-related genes correlated to CDH1 (E-Cadherin) (b, 76GS score).

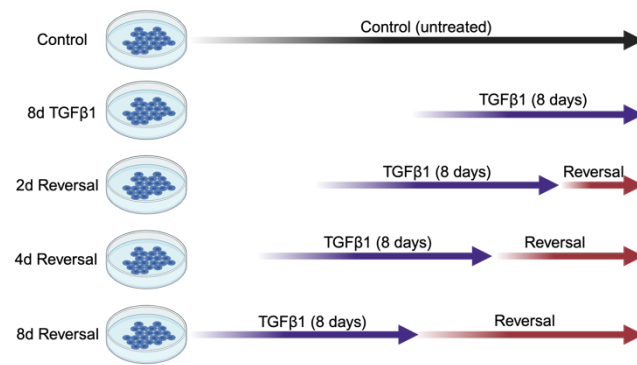

**Figure S6. Schematic illustration of the EMT reversal experiment.** NMuMG cells were either unstimulated (control) or stimulated with TGF- $\beta$ 1 for 8 days, followed by withdrawal TGF- $\beta$ 1 from the culture medium for 2, 4, or 8 days, to study reversal of EMT. Image created with Biorender.com.

**a**

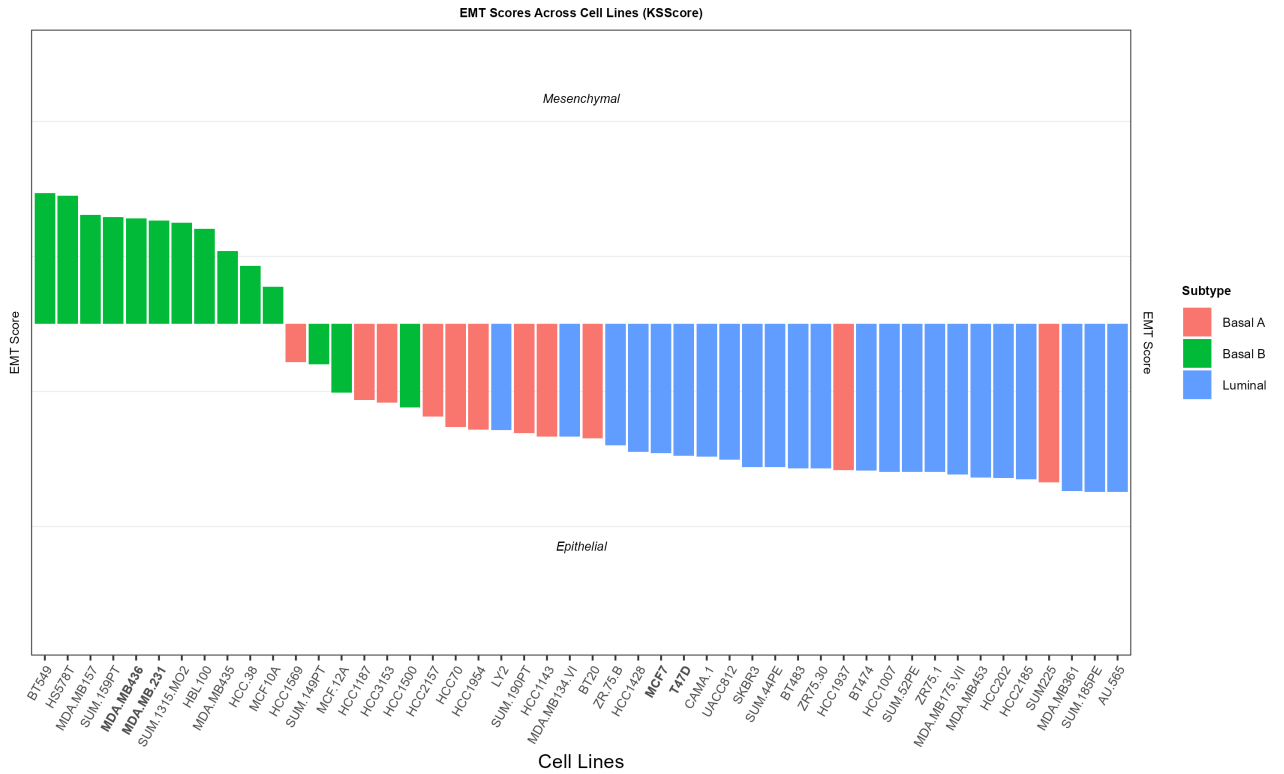

**b**

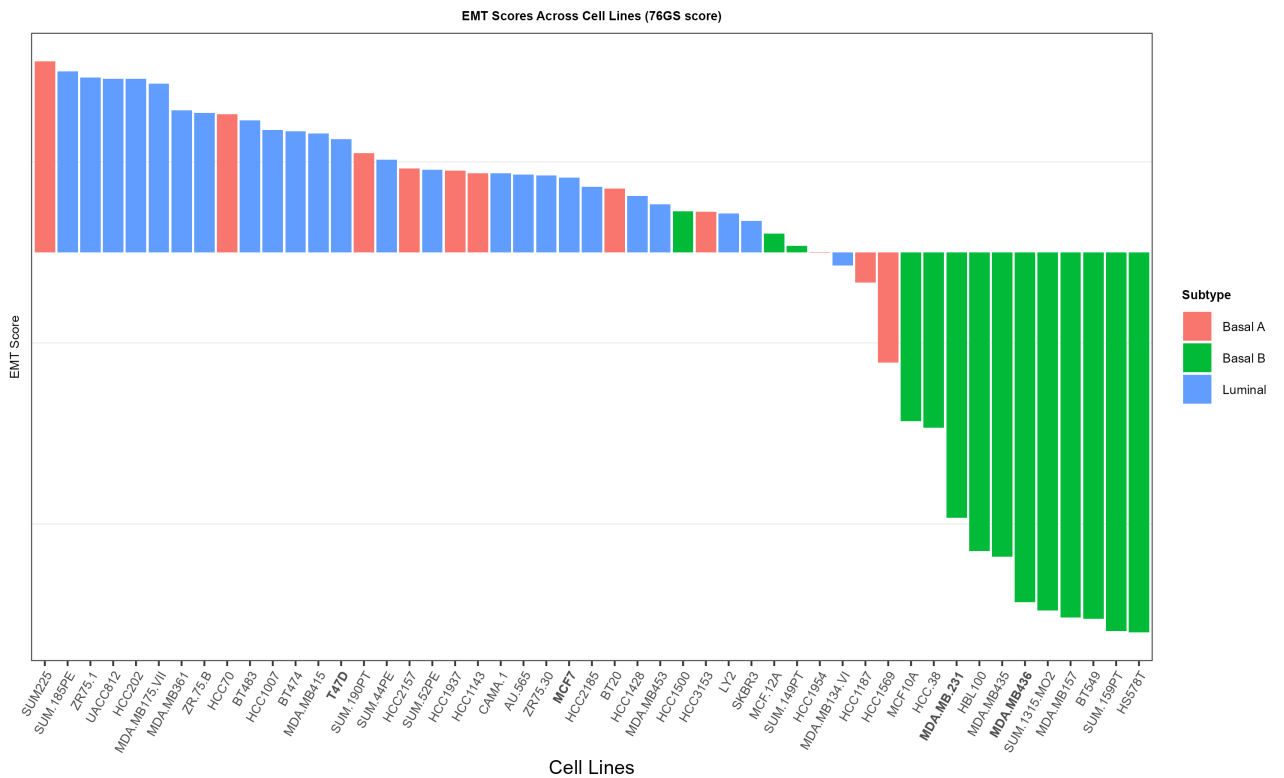

**Figure S7. EMT scores across breast cancer cell lines using transcriptional scoring methods. a**, EMT scores of 52 human breast cancer cell lines from the GOBO database were calculated using the KSScore method. Cell lines are ranked along the EMT spectrum, with mesenchymal and epithelial phenotypes represented by positive and negative probabilities, respectively. Subtypes classification (Basal A, Basal B, and Luminal) were adopted from the GOBO database and are color-coded for visualization. Breast cancer cell lines available in-house and subjected to EMT scoring are displayed in bold font. **b**, EMT scores of the same 52 cell lines were calculated using the 76GS scoring method. Results are consistent with the KSScore method, further validating the classification of epithelial and mesenchymal phenotypes across different breast cancer cell subtypes.



**Supplementary Table 3: Image-iT™ Cell Painting Kit dilution scheme.**

| <b>Dye (stock concentration)</b>                        | <b>Dilution from stock solution</b> | <b>Final concentration</b> | <b>Per 96-well plate (4 mL)</b> |
|---------------------------------------------------------|-------------------------------------|----------------------------|---------------------------------|
| <b>Hoechst 34580 (10 mg/mL)</b>                         | 1:20000                             | 0.5 µg/mL                  | 0.2 µL                          |
| <b>Concanavalin A, Alexa Fluor 488 (5mg/ml)</b>         | 0,73611                             | 5 µg/mL                    | 4 µL                            |
| <b>SYTO 14 stain (5 mM)</b>                             | 0,62014                             | 6 µM                       | 4.8 µL                          |
| <b>Wheat Germ Agglutinin, Alexa Fluor 555 (1 mg/ml)</b> | 0,50417                             | 1.5 µg/mL                  | 6 µL                            |
| <b>Alexa Fluor 568 Phalloidin (66 µM)</b>               | 5,59722                             | 8.25 nM                    | 0.5 µL                          |

**Supplementary Table 4: Image-iT™ Cell Painting Kit microscopy settings.**

| <b>Dye</b>                                   | <b>Laser</b> | <b>Organelle/cellular component</b> |
|----------------------------------------------|--------------|-------------------------------------|
| <b>Hoechst 34580</b>                         | 405          | Nucleus                             |
| <b>Concanavalin A/Alexa Fluor488</b>         | 477          | Endoplasmic reticulum               |
| <b>SYTO 14 green, fluorescent stain</b>      | 518          | Nucleoli, cytoplasmic RNA           |
| <b>Phalloidin Alexa Fluor 568</b>            | 545          | F-actin cytoskeleton                |
| <b>Wheat germ agglutinin Alexa Fluor 555</b> | 545          | Golgi, plasma membrane              |
| <b>MitoTracker Deep Red</b>                  | 637          | Mitochondria                        |
