# Supplementary material for: A Morphology-Based Machine Learning Model for Scoring Epithelial-Mesenchymal Plasticity using Organelle Dynamics.
Source: Research Square preprint supplement (doi:10.21203/rs.3.rs-5859608/v1), 2025-03-21
Supplement: Supplementary file 2 [file ad70cc268612b734f8156974.xlsx]

## Sheet: CP015_layout
	1	2	3	4	5	6	7	8	9	10	11	12
A															NMUMG Control
B															NMUMG 24h TGFb1
C															NMUMG 48h TGFb1
D															NMUMG 4d TGFb1
E															NMUMG 8d TGFb1
F															PBS/HBSS
G
H
Seeded 27-5-2024
10.000 cells per well in 100 uL.
All cells were P7

## Sheet: CP015_names
Well	Condition	Celline	Plate
B02	48h TGFb1	NMuMG	CP015
B03	48h TGFb1	NMuMG	CP015
B04	48h TGFb1	NMuMG	CP015
B05	48h TGFb1	NMuMG	CP015
B06	48h TGFb1	NMuMG	CP015
B07	Control	NMuMG	CP015
B08	Control	NMuMG	CP015
B09	Control	NMuMG	CP015
B10	Control	NMuMG	CP015
B11	Control	NMuMG	CP015
C02	Control	NMuMG	CP015
C03	Control	NMuMG	CP015
C04	Control	NMuMG	CP015
C05	Control	NMuMG	CP015
C06	Control	NMuMG	CP015
C07	8d TGFb1	NMuMG	CP015
C08	8d TGFb1	NMuMG	CP015
C09	8d TGFb1	NMuMG	CP015
C10	8d TGFb1	NMuMG	CP015
C11	8d TGFb1	NMuMG	CP015
D02	8d TGFb1	NMuMG	CP015
D03	8d TGFb1	NMuMG	CP015
D04	8d TGFb1	NMuMG	CP015
D05	8d TGFb1	NMuMG	CP015
D06	8d TGFb1	NMuMG	CP015
D07	48h TGFb1	NMuMG	CP015
D08	48h TGFb1	NMuMG	CP015
D09	48h TGFb1	NMuMG	CP015
D10	48h TGFb1	NMuMG	CP015
D11	48h TGFb1	NMuMG	CP015
E02	4d TGFb1	NMuMG	CP015
E03	4d TGFb1	NMuMG	CP015
E04	4d TGFb1	NMuMG	CP015
E05	4d TGFb1	NMuMG	CP015
E06	4d TGFb1	NMuMG	CP015
E07	8d TGFb1	NMuMG	CP015
E08	8d TGFb1	NMuMG	CP015
E09	8d TGFb1	NMuMG	CP015
E10	8d TGFb1	NMuMG	CP015
E11	8d TGFb1	NMuMG	CP015
F02	24h TGFb1	NMuMG	CP015
F03	24h TGFb1	NMuMG	CP015
F04	24h TGFb1	NMuMG	CP015
F05	24h TGFb1	NMuMG	CP015
F06	24h TGFb1	NMuMG	CP015
F07	4d TGFb1	NMuMG	CP015
F08	4d TGFb1	NMuMG	CP015
F09	4d TGFb1	NMuMG	CP015
F10	4d TGFb1	NMuMG	CP015
F11	4d TGFb1	NMuMG	CP015
G02	Control	NMuMG	CP015
G03	Control	NMuMG	CP015
G04	Control	NMuMG	CP015
G05	Control	NMuMG	CP015
G06	Control	NMuMG	CP015
G07	24h TGFb1	NMuMG	CP015
G08	24h TGFb1	NMuMG	CP015
G09	24h TGFb1	NMuMG	CP015
G10	24h TGFb1	NMuMG	CP015
G11	24h TGFb1	NMuMG	CP015

## Sheet: CP016_layout
	1	2	3	4	5	6	7	8	9	10	11	12
A															NMUMG Control
B															NMUMG 24h TGFb1
C															NMUMG 48h TGFb1
D															NMUMG 4d TGFb1
E															NMUMG 8d TGFb1
F															PBS/HBSS
G
H
Seeded 30-5-2024
10.000 cells per well in 100 uL.
All cells were P9

## Sheet: CP016_names
Well	Condition	Celline	Plate
B02	Control	NMuMG	CP016
B03	Control	NMuMG	CP016
B04	Control	NMuMG	CP016
B05	Control	NMuMG	CP016
B06	Control	NMuMG	CP016
B07	8d TGFb1	NMuMG	CP016
B08	8d TGFb1	NMuMG	CP016
B09	8d TGFb1	NMuMG	CP016
B10	8d TGFb1	NMuMG	CP016
B11	8d TGFb1	NMuMG	CP016
C02	8d TGFb1	NMuMG	CP016
C03	8d TGFb1	NMuMG	CP016
C04	8d TGFb1	NMuMG	CP016
C05	8d TGFb1	NMuMG	CP016
C06	8d TGFb1	NMuMG	CP016
C07	48h TGFb1	NMuMG	CP016
C08	48h TGFb1	NMuMG	CP016
C09	48h TGFb1	NMuMG	CP016
C10	48h TGFb1	NMuMG	CP016
C11	48h TGFb1	NMuMG	CP016
D02	4d TGFb1	NMuMG	CP016
D03	4d TGFb1	NMuMG	CP016
D04	4d TGFb1	NMuMG	CP016
D05	4d TGFb1	NMuMG	CP016
D06	4d TGFb1	NMuMG	CP016
D07	8d TGFb1	NMuMG	CP016
D08	8d TGFb1	NMuMG	CP016
D09	8d TGFb1	NMuMG	CP016
D10	8d TGFb1	NMuMG	CP016
D11	8d TGFb1	NMuMG	CP016
E02	24h TGFb1	NMuMG	CP016
E03	24h TGFb1	NMuMG	CP016
E04	24h TGFb1	NMuMG	CP016
E05	24h TGFb1	NMuMG	CP016
E06	24h TGFb1	NMuMG	CP016
E07	4d TGFb1	NMuMG	CP016
E08	4d TGFb1	NMuMG	CP016
E09	4d TGFb1	NMuMG	CP016
E10	4d TGFb1	NMuMG	CP016
E11	4d TGFb1	NMuMG	CP016
F02	Control	NMuMG	CP016
F03	Control	NMuMG	CP016
F04	Control	NMuMG	CP016
F05	Control	NMuMG	CP016
F06	Control	NMuMG	CP016
F07	24h TGFb1	NMuMG	CP016
F08	24h TGFb1	NMuMG	CP016
F09	24h TGFb1	NMuMG	CP016
F10	24h TGFb1	NMuMG	CP016
F11	24h TGFb1	NMuMG	CP016
G02	48h TGFb1	NMuMG	CP016
G03	48h TGFb1	NMuMG	CP016
G04	48h TGFb1	NMuMG	CP016
G05	48h TGFb1	NMuMG	CP016
G06	48h TGFb1	NMuMG	CP016
G07	Control	NMuMG	CP016
G08	Control	NMuMG	CP016
G09	Control	NMuMG	CP016
G10	Control	NMuMG	CP016
G11	Control	NMuMG	CP016

## Sheet: CP017_layout
	1	2	3	4	5	6	7	8	9	10	11	12
A															NMUMG Control
B															NMUMG 8d TGFb1
C															NMUMG 8d TGFb1 + 2d rev
D															NMUMG 8d TGFb1 + 4d rev
E															NMUMG 8d TGFb1 + 8d rev
F															PBS/HBSS
G
H
Seeded 6-6-2024
10.000 cells per well in 100 uL.
All cells were P11

## Sheet: CP017_names
Well	Condition	Celline	Plate
B02	2d Reversal	NMuMG	CP017
B03	2d Reversal	NMuMG	CP017
B04	2d Reversal	NMuMG	CP017
B05	2d Reversal	NMuMG	CP017
B06	2d Reversal	NMuMG	CP017
B07	Control	NMuMG	CP017
B08	Control	NMuMG	CP017
B09	Control	NMuMG	CP017
B10	Control	NMuMG	CP017
B11	Control	NMuMG	CP017
C02	Control	NMuMG	CP017
C03	Control	NMuMG	CP017
C04	Control	NMuMG	CP017
C05	Control	NMuMG	CP017
C06	Control	NMuMG	CP017
C07	8d TGFb1	NMuMG	CP017
C08	8d TGFb1	NMuMG	CP017
C09	8d TGFb1	NMuMG	CP017
C10	8d TGFb1	NMuMG	CP017
C11	8d TGFb1	NMuMG	CP017
D02	8d Reversal	NMuMG	CP017
D03	8d Reversal	NMuMG	CP017
D04	8d Reversal	NMuMG	CP017
D05	8d Reversal	NMuMG	CP017
D06	8d Reversal	NMuMG	CP017
D07	2d Reversal	NMuMG	CP017
D08	2d Reversal	NMuMG	CP017
D09	2d Reversal	NMuMG	CP017
D10	2d Reversal	NMuMG	CP017
D11	2d Reversal	NMuMG	CP017
E02	4d Reversal	NMuMG	CP017
E03	4d Reversal	NMuMG	CP017
E04	4d Reversal	NMuMG	CP017
E05	4d Reversal	NMuMG	CP017
E06	4d Reversal	NMuMG	CP017
E07	8d Reversal	NMuMG	CP017
E08	8d Reversal	NMuMG	CP017
E09	8d Reversal	NMuMG	CP017
E10	8d Reversal	NMuMG	CP017
E11	8d Reversal	NMuMG	CP017
F02	8d TGFb1	NMuMG	CP017
F03	8d TGFb1	NMuMG	CP017
F04	8d TGFb1	NMuMG	CP017
F05	8d TGFb1	NMuMG	CP017
F06	8d TGFb1	NMuMG	CP017
F07	4d Reversal	NMuMG	CP017
F08	4d Reversal	NMuMG	CP017
F09	4d Reversal	NMuMG	CP017
F10	4d Reversal	NMuMG	CP017
F11	4d Reversal	NMuMG	CP017
G02	Control	NMuMG	CP017
G03	Control	NMuMG	CP017
G04	Control	NMuMG	CP017
G05	Control	NMuMG	CP017
G06	Control	NMuMG	CP017
G07	8d TGFb1	NMuMG	CP017
G08	8d TGFb1	NMuMG	CP017
G09	8d TGFb1	NMuMG	CP017
G10	8d TGFb1	NMuMG	CP017
G11	8d TGFb1	NMuMG	CP017

## Sheet: CP018_layout
	1	2	3	4	5	6	7	8	9	10	11	12
A															NMUMG Control
B															NMUMG 24h TGFb1
C															NMUMG 48h TGFb1
D															NMUMG 4d TGFb1
E															NMUMG 8d TGFb1
F															PBS/HBSS
G
H
Seeded 6-6-2024
10.000 cells per well in 100 uL.
All cells were P11

## Sheet: CP018_names
Well	Condition	Celline	Plate
B02	24h TGFb1	NMuMG	CP018
B03	24h TGFb1	NMuMG	CP018
B04	24h TGFb1	NMuMG	CP018
B05	24h TGFb1	NMuMG	CP018
B06	24h TGFb1	NMuMG	CP018
B07	8d TGFb1	NMuMG	CP018
B08	8d TGFb1	NMuMG	CP018
B09	8d TGFb1	NMuMG	CP018
B10	8d TGFb1	NMuMG	CP018
B11	8d TGFb1	NMuMG	CP018
C02	Control	NMuMG	CP018
C03	Control	NMuMG	CP018
C04	Control	NMuMG	CP018
C05	Control	NMuMG	CP018
C06	Control	NMuMG	CP018
C07	24h TGFb1	NMuMG	CP018
C08	24h TGFb1	NMuMG	CP018
C09	24h TGFb1	NMuMG	CP018
C10	24h TGFb1	NMuMG	CP018
C11	24h TGFb1	NMuMG	CP018
D02	48h TGFb1	NMuMG	CP018
D03	48h TGFb1	NMuMG	CP018
D04	48h TGFb1	NMuMG	CP018
D05	48h TGFb1	NMuMG	CP018
D06	48h TGFb1	NMuMG	CP018
D07	Control	NMuMG	CP018
D08	Control	NMuMG	CP018
D09	Control	NMuMG	CP018
D10	Control	NMuMG	CP018
D11	Control	NMuMG	CP018
E02	Control	NMuMG	CP018
E03	Control	NMuMG	CP018
E04	Control	NMuMG	CP018
E05	Control	NMuMG	CP018
E06	Control	NMuMG	CP018
E07	4d TGFb1	NMuMG	CP018
E08	4d TGFb1	NMuMG	CP018
E09	4d TGFb1	NMuMG	CP018
E10	4d TGFb1	NMuMG	CP018
E11	4d TGFb1	NMuMG	CP018
F02	8d TGFb1	NMuMG	CP018
F03	8d TGFb1	NMuMG	CP018
F04	8d TGFb1	NMuMG	CP018
F05	8d TGFb1	NMuMG	CP018
F06	8d TGFb1	NMuMG	CP018
F07	48h TGFb1	NMuMG	CP018
F08	48h TGFb1	NMuMG	CP018
F09	48h TGFb1	NMuMG	CP018
F10	48h TGFb1	NMuMG	CP018
F11	48h TGFb1	NMuMG	CP018
G02	4d TGFb1	NMuMG	CP018
G03	4d TGFb1	NMuMG	CP018
G04	4d TGFb1	NMuMG	CP018
G05	4d TGFb1	NMuMG	CP018
G06	4d TGFb1	NMuMG	CP018
G07	8d TGFb1	NMuMG	CP018
G08	8d TGFb1	NMuMG	CP018
G09	8d TGFb1	NMuMG	CP018
G10	8d TGFb1	NMuMG	CP018
G11	8d TGFb1	NMuMG	CP018

## Sheet: CP019_layout
	1	2	3	4	5	6	7	8	9	10	11	12
A															NMUMG Control
B															NMUMG 24h TGFb1
C															NMUMG 48h TGFb1
D															NMUMG 4d TGFb1
E															NMUMG 8d TGFb1
F															PBS/HBSS
G
H
Seeded 13-6-2024
10.000 cells per well in 100 uL.
All cells were P10

## Sheet: CP019_names
Well	Condition	Celline	Plate
B02	Control	NMuMG	CP019
B03	Control	NMuMG	CP019
B04	Control	NMuMG	CP019
B05	Control	NMuMG	CP019
B06	Control	NMuMG	CP019
B07	24h TGFb1	NMuMG	CP019
B08	24h TGFb1	NMuMG	CP019
B09	24h TGFb1	NMuMG	CP019
B10	24h TGFb1	NMuMG	CP019
B11	24h TGFb1	NMuMG	CP019
C02	8d TGFb1	NMuMG	CP019
C03	8d TGFb1	NMuMG	CP019
C04	8d TGFb1	NMuMG	CP019
C05	8d TGFb1	NMuMG	CP019
C06	8d TGFb1	NMuMG	CP019
C07	Control	NMuMG	CP019
C08	Control	NMuMG	CP019
C09	Control	NMuMG	CP019
C10	Control	NMuMG	CP019
C11	Control	NMuMG	CP019
D02	4d TGFb1	NMuMG	CP019
D03	4d TGFb1	NMuMG	CP019
D04	4d TGFb1	NMuMG	CP019
D05	4d TGFb1	NMuMG	CP019
D06	4d TGFb1	NMuMG	CP019
D07	48h TGFb1	NMuMG	CP019
D08	48h TGFb1	NMuMG	CP019
D09	48h TGFb1	NMuMG	CP019
D10	48h TGFb1	NMuMG	CP019
D11	48h TGFb1	NMuMG	CP019
E02	8d TGFb1	NMuMG	CP019
E03	8d TGFb1	NMuMG	CP019
E04	8d TGFb1	NMuMG	CP019
E05	8d TGFb1	NMuMG	CP019
E06	8d TGFb1	NMuMG	CP019
E07	4d TGFb1	NMuMG	CP019
E08	4d TGFb1	NMuMG	CP019
E09	4d TGFb1	NMuMG	CP019
E10	4d TGFb1	NMuMG	CP019
E11	4d TGFb1	NMuMG	CP019
F02	24h TGFb1	NMuMG	CP019
F03	24h TGFb1	NMuMG	CP019
F04	24h TGFb1	NMuMG	CP019
F05	24h TGFb1	NMuMG	CP019
F06	24h TGFb1	NMuMG	CP019
F07	48h TGFb1	NMuMG	CP019
F08	48h TGFb1	NMuMG	CP019
F09	48h TGFb1	NMuMG	CP019
F10	48h TGFb1	NMuMG	CP019
F11	48h TGFb1	NMuMG	CP019
G02	Control	NMuMG	CP019
G03	Control	NMuMG	CP019
G04	Control	NMuMG	CP019
G05	Control	NMuMG	CP019
G06	Control	NMuMG	CP019
G07	8d TGFb1	NMuMG	CP019
G08	8d TGFb1	NMuMG	CP019
G09	8d TGFb1	NMuMG	CP019
G10	8d TGFb1	NMuMG	CP019
G11	8d TGFb1	NMuMG	CP019

[truncated: 2 more sheets: CP020_layout, CP020_names]
